# Supplementary material for: Untargeted Metabolomics of Rind Essential Oils Allowed to Differentiate Two Closely Related Clementine Varieties
Source: MDPI journal article supplement (doi:10.3390/plants10091789), 2021-08-27
Supplement: s1 [file s1]

**Table S1.** Volatile organic compounds showing a statistically significant evolution during the harvesting period.

| LRI  | Type of compound      | Probable Formula | Mass spectrum similarity      | MS similarity | Season 1      |         | Season 2      |         |
|------|-----------------------|------------------|-------------------------------|---------------|---------------|---------|---------------|---------|
|      |                       |                  |                               |               | Ratio 6-8/1-3 | p-value | Ratio 6-7/1-3 | p-value |
| 936  | MTH                   | C10H16           |                               |               | 0,70          | <0.01   | 0,56          | <0.01   |
| 948  | MTH                   | C10H16           | $\alpha$ -pinene              | STD           | 0,82          | <0.05   |               | ns      |
| 986  | MTH                   | C10H16           | $\beta$ -phellandrene         | 913, 929      | 0,66          | <0.05   | 0,70          | <0.01   |
| 992  | MTH                   | C10H16           | $\beta$ -myrcene              | STD           | 0,89          | <0.05   | 0,61          | <0.01   |
| 997  | MTH                   | C10H16           | $\beta$ -pinene               | STD           | 0,68          | <0.01   | 0,67          | <0.01   |
| 1070 | MTH                   | C10H16           | $\gamma$ -terpinene           | STD           | 0,73          | <0.01   | 0,64          | <0.01   |
| 1158 | MTAld                 | C10H18O          | citronellal                   | STD           | 1,40          | <0.01   |               | ns      |
| 1270 | Fatty acid derivative | C10H18O          | ( <i>E</i> )-2-decen-1-ol     | 901, 950      | 1,70          | <0.01   | 2,01          | <0.01   |
| 1275 | Fatty acid derivative | C10H22O          | 1-decanol                     | STD           | 0,61          | <0.01   | 0,57          | <0.01   |
| 1304 | MTAld                 | C10H18O          |                               | 850, 882      | 1,50          | <0.01   |               | ns      |
| 1331 | Fatty acid derivative | C10H16O          | ( <i>E,E</i> )-2,4-decadienal | STD           | 1,80          | <0.01   |               | ns      |
| 1376 | STH                   | C15H24           | $\alpha$ -cubebene            | 917, 937      |               | ns      | 0,74          | <0.01   |
| 1402 | Fatty acid derivative | C12H22O          | dodecenal                     | 846, 821      | 1,56          | <0.01   | 1,32          | <0.01   |
| 1417 | STH                   | C15H24           |                               |               | 0,73          | <0.01   | 0,73          | <0.01   |
| 1423 | Oxygenated terpenoid  |                  |                               |               | 1,76          | <0.01   | 1,71          | <0.01   |
| 1459 | STH                   | C15H24           |                               | 920, 923      | 0,62          | <0.01   | 0,56          | <0.01   |
| 1464 | STH                   | C15H24           | $\beta$ -caryophyllene        | STD           | 0,78          | <0.01   | 0,80          | <0.01   |
| 1511 | STH                   | C15H24           | $\alpha$ -farnesene           | STD           | 0,73          | <0.05   | 0,62          | <0.01   |
| 1547 | STH                   | C15H24           |                               | 868, 875      | 0,62          | <0.01   | 0,74          | <0.01   |
| 1569 | STH                   | C15H24           |                               | 853, 858      | 0,71          | <0.01   | 0,49          | <0.01   |
| 1572 | STH                   | C15H24           |                               | 837, 870      | 0,76          | <0.01   | 0,69          | <0.01   |
| 1596 | Fatty acid derivative | C16H28O          | hexadecadienal                | 788, 866      | 1,85          | <0.01   | 1,76          | <0.01   |
| 1683 | STOH                  | C15H24O          |                               |               | 1,40          | <0.05   | 1,18          | <0.01   |
| 1712 | STAld                 | C15H22O          | $\beta$ -sinensal             | 861, 909      | 0,71          | <0.01   | 0,67          | <0.01   |
| 1827 | Fatty acid derivative | C18H34O          | octadecenal                   | 723, 725      | 1,58          | <0.05   |               | ns      |

Unequivocal identification with a pure standard is indicated as STD. When it was not available, a tentative identification was performed by mass spectral similarity and Linear Retention Index. MTH, Monoterpene Hydrocarbon; MTAld, Monoterpene Aldehyde; STH, Sesquiterpene Hydrocarbon; STOH, Sesquiterpene Alcohol; STAld, Sesquiterpene Aldehyde. MS similarity corresponds to the direct and reverse match of mass spectrum when compared to the NIST05 Mass Spectral Library. A tentative identity has been assigned to those compounds with higher mass spectral similitude based on MS and Linear Retention Index.
