# Supplementary material for: Untargeted Metabolomics of Rind Essential Oils Allowed to Differentiate Two Closely Related Clementine Varieties
Source: MDPI journal article supplement (doi:10.3390/plants10091789), 2021-08-27
Supplement: s1 [file s1]

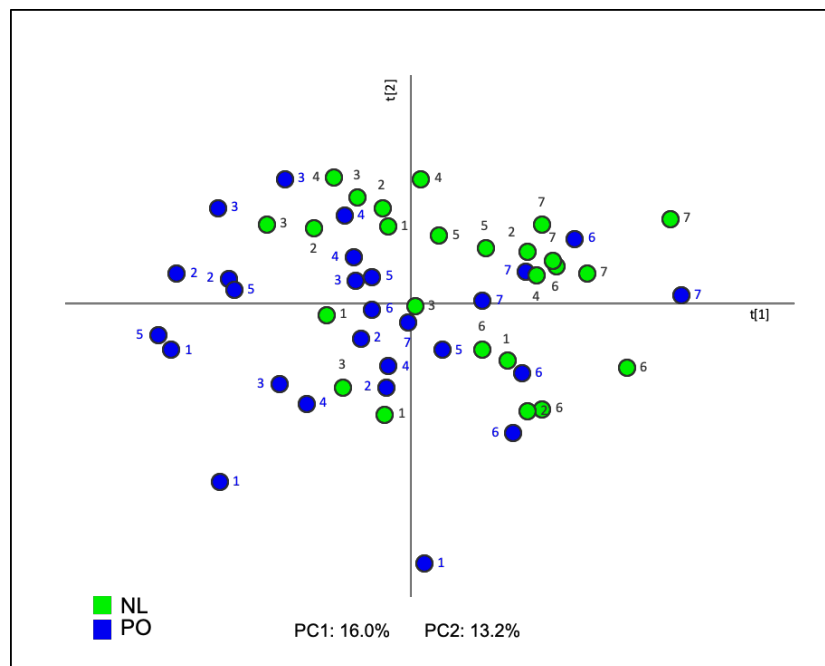

**Figure S2.** Score plot of the Principal Component Analysis (PCA) based on the whole array of the mass spectra within a  $m/z$  range from 35 to 220 obtained from samples of Clemenules (NL: green) and Clemenpons (PO: blue) collected during season 2, numbers 1 to 7 account for harvest day, from earlier date (1) to later date (7). PC1: first principal component; PC2: second principal component.
