# Supplementary figures and images for: Untargeted Metabolomics of Rind Essential Oils Allowed to Differentiate Two Closely Related Clementine Varieties
Source: MDPI journal article supplement (doi:10.3390/plants10091789), 2021-08-27

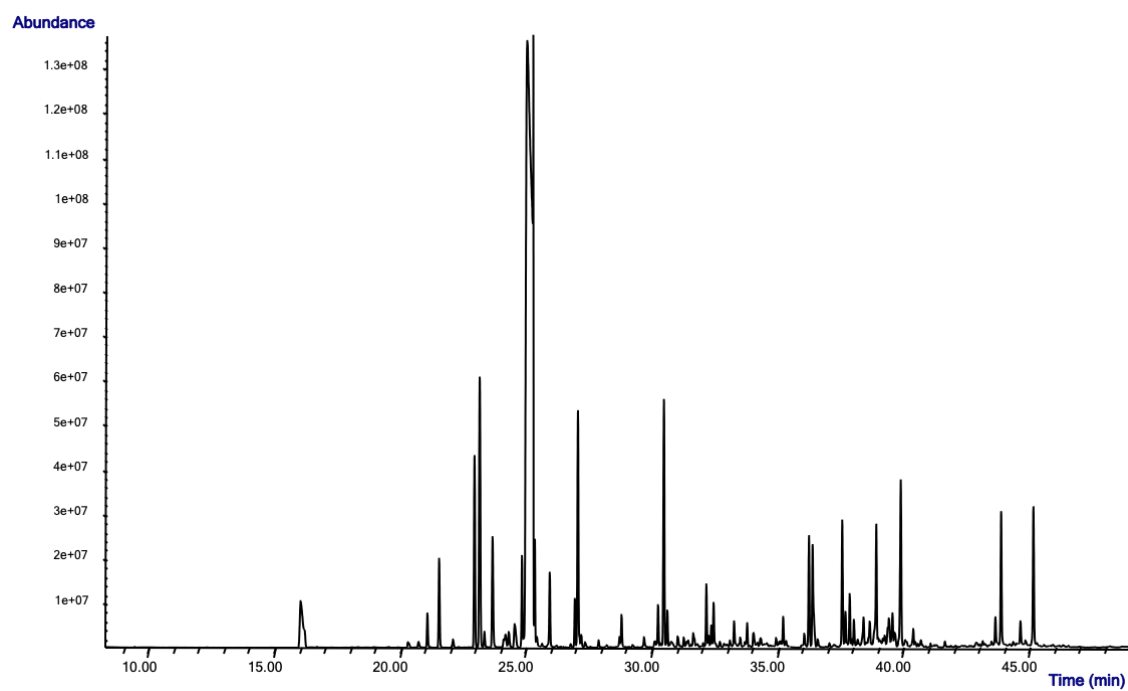

**Figure S1.** Total Ion Count GC-MS chromatogram of a Clemnpons rind essential oil sample.

Supplement: s1 [file s1]
